# Supplementary material for: A Study of the Degradation of LEV by Transparent PVA/NCD-TiO2 Nanocomposite Films with Enhanced Visible-Light Photocatalytic Activity
Source: MDPI journal article supplement (doi:10.3390/catal12111336), 2022-11-01

## **Supplementary Material**

### **A Study of the Degradation of LEV by Transparent PVA/NCD-TiO<sub>2</sub> Nanocomposite Films with Enhanced Visible-light Photocatalytic Activity**

**Anhua Jiang <sup>1</sup>, Xinwen Huang <sup>1,\*</sup>, Geshan Zhang <sup>2,3,\*</sup>, Wanquan Yang <sup>4</sup>**

<sup>1</sup> College of Environment, Zhejiang University of Technology, Hangzhou 310014, China

<sup>2</sup> College of Chemical Engineering, Zhejiang University of Technology, Hangzhou 310014, China

<sup>3</sup> School of Chemistry and Environmental Engineering, Wuhan Institute of Technology, Wuhan 430205, China

<sup>4</sup> Powerchina Huadong Engineering Corporation Limited, Hangzhou, 311122, China

\*Corresponding author Email: zhanggs@zjut.edu.cn

Tel: +86-0571-8832-0412

**Figure S1** SEM images of the surfaces of 8wt%-80-PVA/NCD-TiO<sub>2</sub>

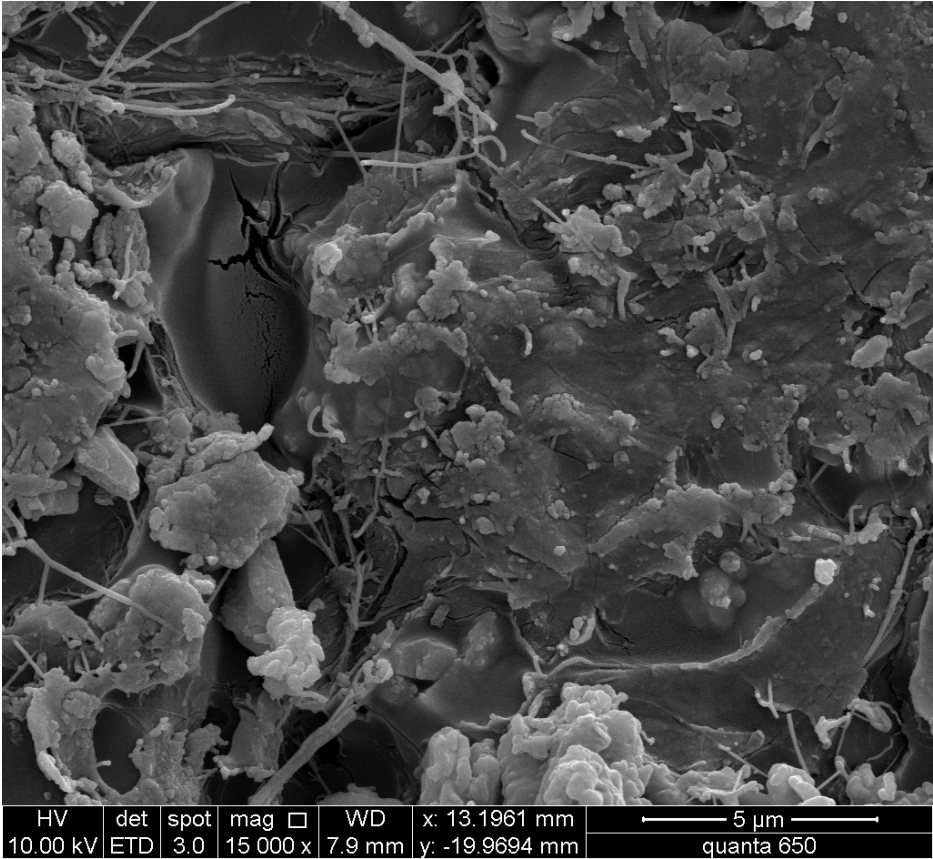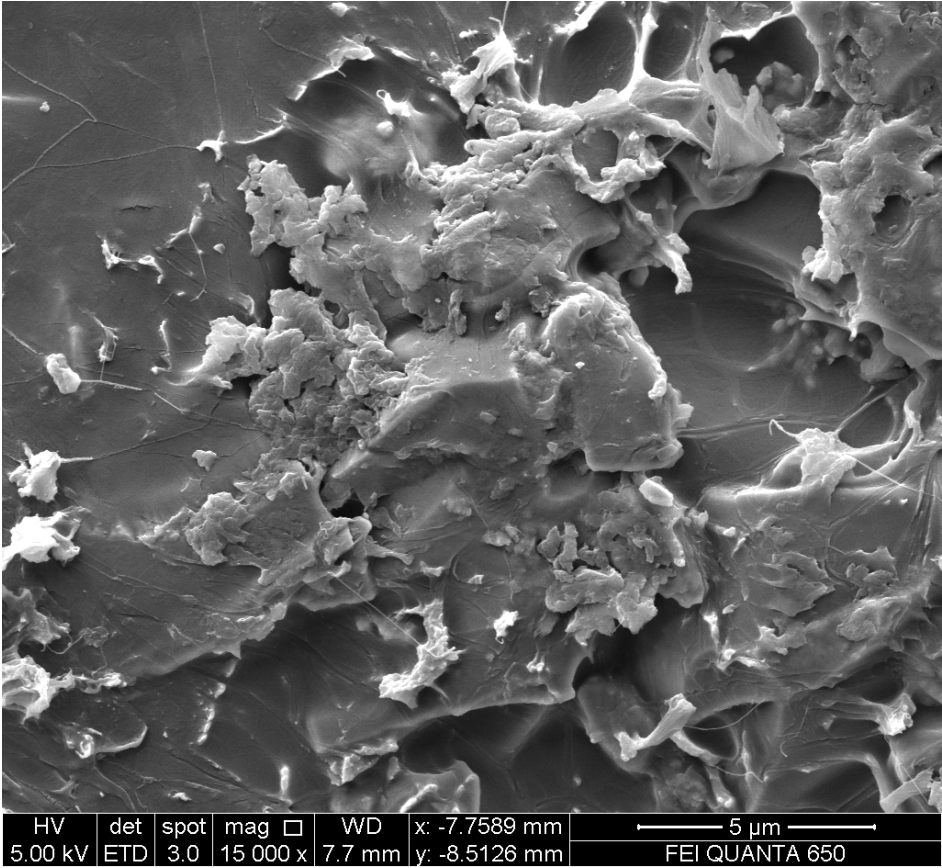

**Figure S2** The Raman spectra of different synthesized materials

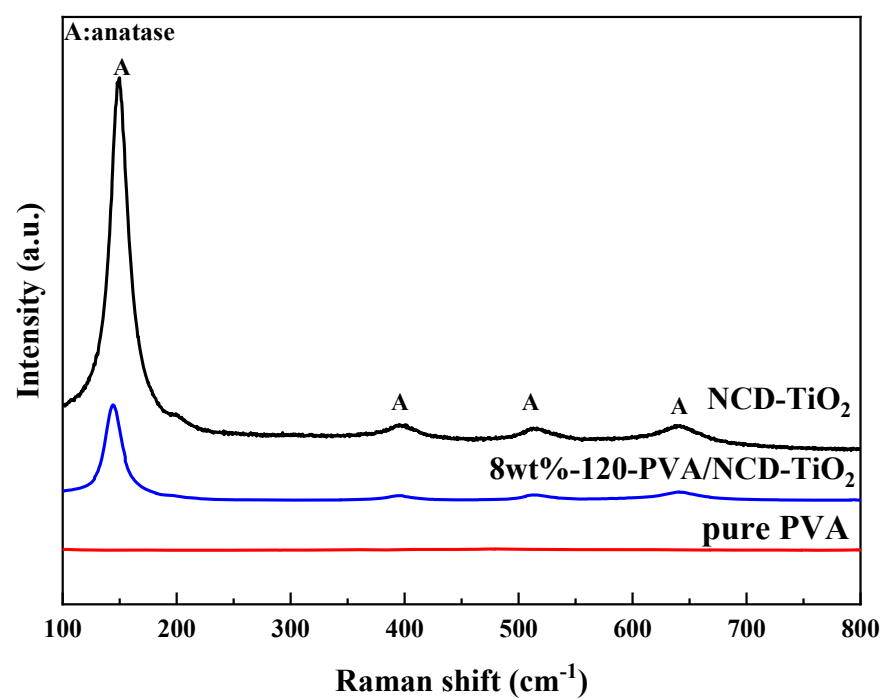

**Figure S3** The UV-vis absorption spectra of different synthesized materials

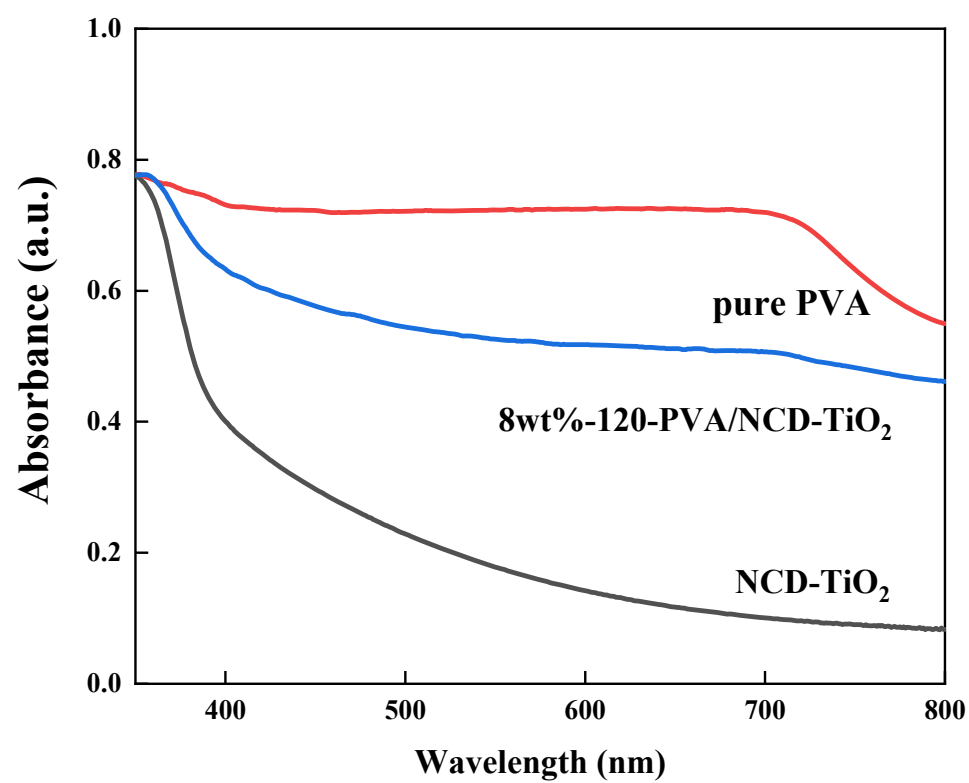

Supplement: s1 [file s1]
